# Supplementary material for: Pannexin-1 Modulates Inhibitory Transmission and Hippocampal Synaptic Plasticity
Source: MDPI journal article supplement (doi:10.3390/biom13060887), 2023-05-25
Supplement: s1 [file s1]

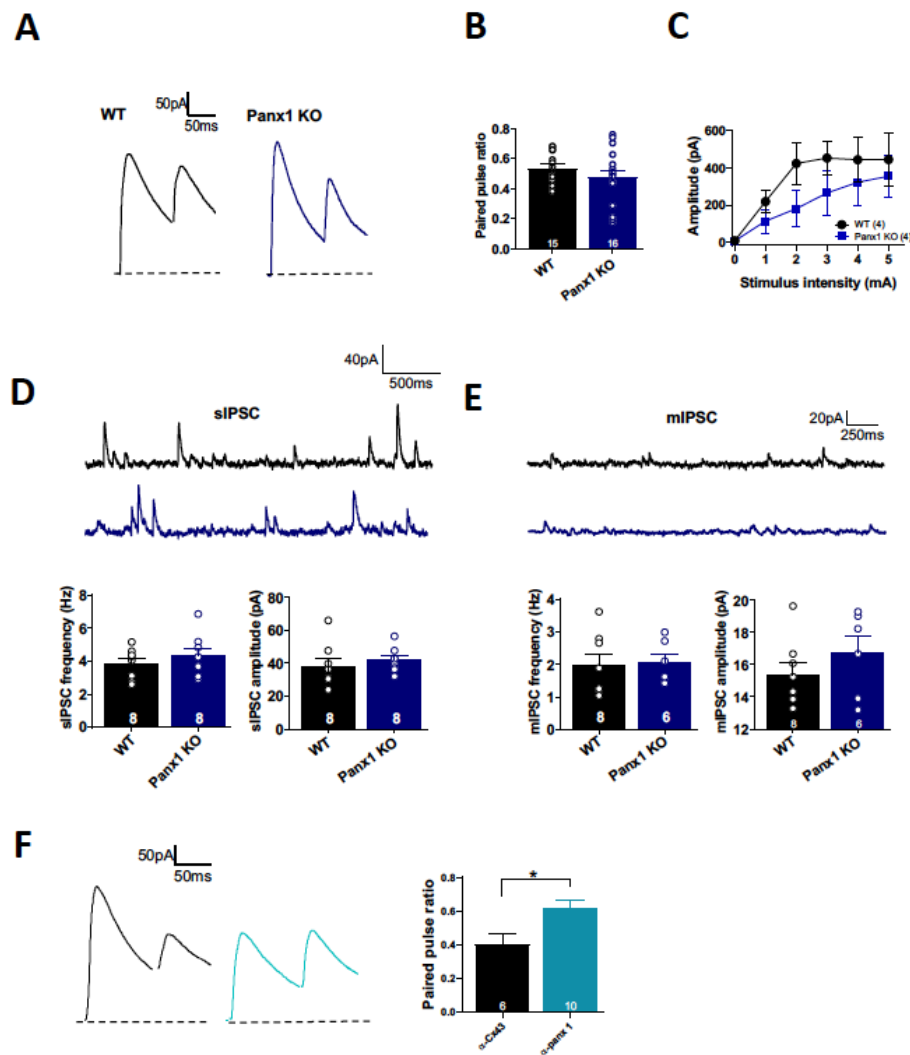

**Figure S1.** Absence of Panx1 did not change basal GABAergic transmission: (A) Samples traces from evoked IPSC and PPR for pyramidal neurons recorded from wt mice (black) and Panx1 KO mice (blue). PPR (B) and IPSCs amplitude (C) were no different between groups. (D) Quantitative analyses of sIPSC frequency (left) and amplitude (right) did not show significant differences between control and Panx1 KO mice. (E) Absence of Panx1 did not affect either mIPSC frequency or mIPSC amplitude compared with WT mice. (F) Representative traces of PPR by using  $\alpha$ -Cx43 (black) and  $\alpha$ -panx1 (skyblue) in the patch pipette. PPR values were significantly higher in the presence of  $\alpha$ -panx1 compared with control condition ( $\alpha$ -Cx43). Data are performed as mean  $\pm$  SEM. Number of recorded cells is indicated within bars.

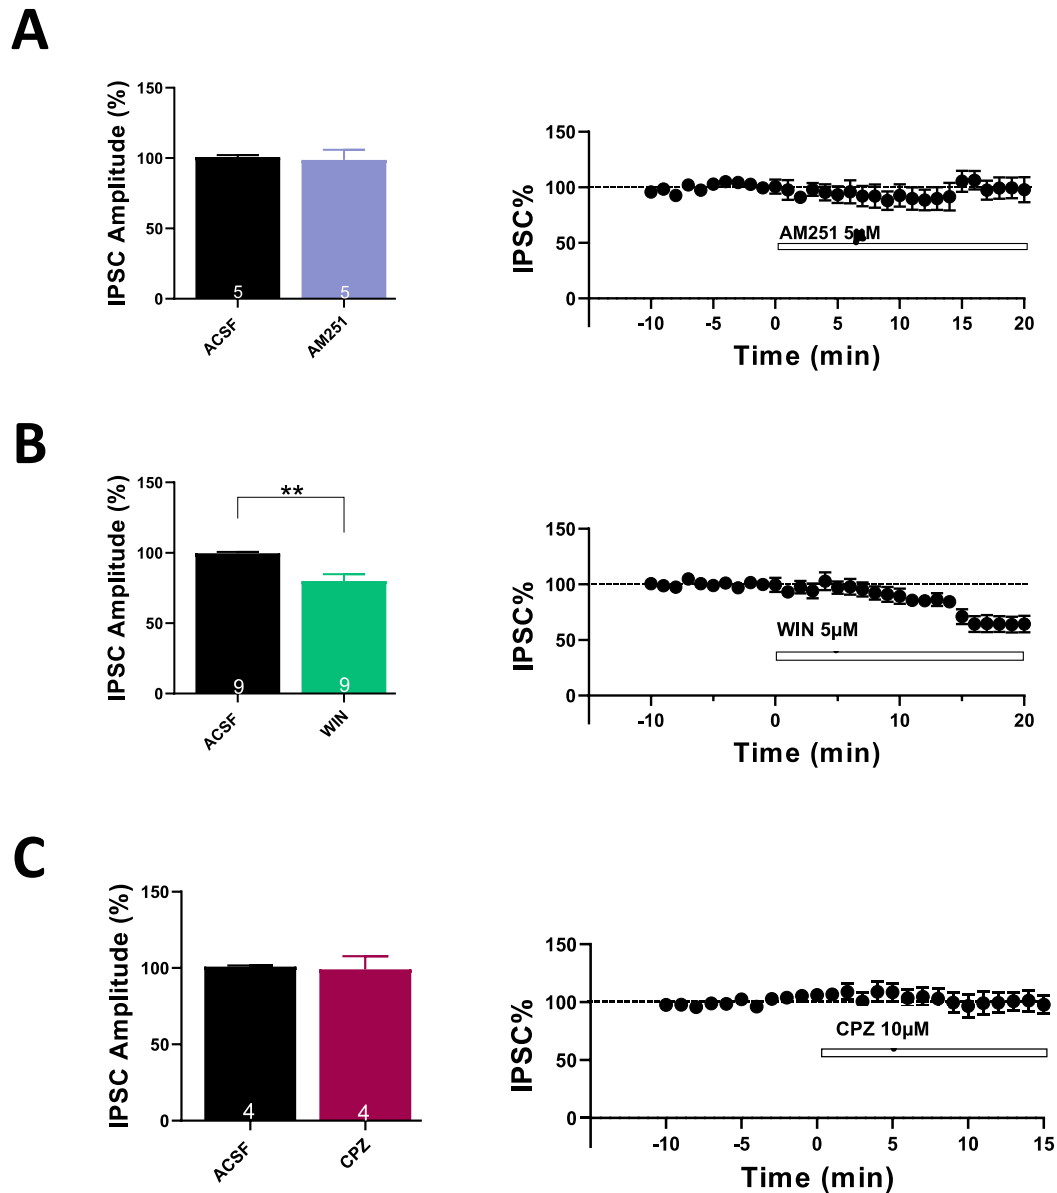

**Figure S2.** Effect the eCB on basal GABA transmission. (A) AM251 perfusion has no effect on basal GABAergic synaptic transmission. (B) Effect of WIN 55,212-2 on evoked IPSCs in a CA1 pyramidal neuron. (C) the specific TRPV1 antago-nist capsaizepine (CPZ, 10  $\mu$ M), bath application of 10Panx1 did not affect IPSC amplitude.
